# Supplementary material for: Effect of hospital delivery volume and travel time on maternal postpartum health service use in Norway: a nationwide population‑based cohort study
Source: Research Square preprint supplement (doi:10.21203/rs.3.rs-8796064/v1), 2026-02-17
Supplement: Supplementary file 1 [file 497268190c8919b78293b999.docx]

**Table S1. Associations between hospital delivery volume and maternal postpartum health service use, presented as absolute risk**

**All women**: analyses included all women and adjusted for observed confounders. The following observed confounders were adjusted : maternal age, parity, maternal education level, immigration status, birth year, month of birth, weekday of birth, actual travel time, GP contact within 1 year before birth, out of hours GP contact within 1 year before birth, contacts with the specialist mental health care within 1 year before birth, GP contact for sick leave within 1 year before birth, GP contacts with psychiatric diagnosis code within 1 year before birth, and Diagnostic-Related Groups (DRG) codes 1 year before birth.

**Moving women**: analyses included women moving between hospital catchment area border between births. The analyses were adjusted for maternal age, parity, birth year and expected travel time.

|  |  | **500 births p.a.** | **1000 births p.a.** | **2000 births p.a.** | **4000 births p.a.** | **5000 births p.a.** |
| --- | --- | --- | --- | --- | --- | --- |
| **Days of GP contact** | All women | *Reference* | -0.03( -0.13 - 0.08) | 0.02 ( -0.15 - 0.18) | -0.01 (-0.16 - 0.13) | -0.12(-0.26 - 0.03) |
| Moving women | *Reference* | 0.04 ( -0.13 - 0.22) | -0.01 ( -0.24 - 0.22) | 0.03 (-0.19 - 0.26) | 0.01 (-0.23 - 0.24) |
| **Days of out of hours GP contact** | All women | *Reference* | 0.01 (-0.02- 0.03) | 0.00 (-0.04 -0.03) | 0.00 (-0.06 - 0.06) | 0.12 (-0.05 - 0.09) |
| Moving women | *Reference* | 0.07 (0.01- 0.13) | 0.08 (0.00 -0.15) | 0.13 (0.06 - 0.21) | 0.11 (0.04 - 0.19) |
| **Days of emergency contacts with hospital** | All women | *Reference* | -0.01 (-0.09 - 0.06) | 0.00 (-0.15 - 0.15) | -0.01 (-0.08 - 0.05) | 0.00 (-0.12 - 0.16) |
| Moving women | *Reference* | 0.05 (-0.03 - 0.13) | 0.07 (-0.03 - 0.17) | -0.03(-0.14 - 0.08) | -0.11 ( -0.22 - 0.00) |
| **Duration of hospital stay after delivery excluding the initial delivery stay** | All women | *Reference* | 0.03 (0.00 -0.06) | 0.05 (0.00 -0.10) | 0.03 (-0.01 - 0.08) | 0.03 (-0.05 -0.10) |
| Moving women | *Reference* | 0.05 (-0.05 -0.15) | 0.09 (-0.05 -0.22) | 0.05 (-0.04 - 0.15) | 0.04 (-0.08 -0.16) |
| **Days in hospital for delivery admission** | All women | *Reference* | 0.13 (-0.01 - 0.27) | 0.06 (-0.15 - 0.27) | -0.21(-0.52 - 0.11) | -0.13 (-0.43 - 0.18) |
| Moving women | *Reference* | -0.06 (-0.14 - 0.01) | -0.16(-0.26 - -0.07) | -0.29 (-0.42 - -0.17) | -0.27 (-0.42 - -0.12) |
| **Days of contacts with specialist mental health service** | All women | *Reference* | 0.02 (-0.01 - 0.05) | 0.03 (-0.01 - 0.07) | 0.01 (-0.03 - 0.05) | 0.01 (-0.02 - 0.05) |
| Moving women | *Reference* | 0.00 (-0.12 - 0.12) | -0.05(-0.19 - 0.08) | 0.04 (-0.12 - 0.20) | 0.03 ( -0.13 - 0.19) |
| **Days of GP contacts for conversation therapy** | All women | *Reference* | -0.05 (-0.11 - 0.00) | -0.10 (-0.17 - -0.02) | -0.03 (-0.09 - 0.04) | 0.02 ( -0.06 - 0.10) |
| Moving women | *Reference* | 0.01 (-0.05 - 0.07) | -0.06 (-0.16 - 0.03) | 0.00 (-0.08 - 0.09) | 0.04 ( -0.05 - 0.14) |
| **Days of GP contacts with psychiatric diagnosis code** | All women | *Reference* | 0.03 (0.01 - 0.05) | 0.06 (0.03- 0.09) | 0.02 (-0.01 - 0.05) | 0.00 ( -0.02 - 0.03) |
| Moving women | *Reference* | 0.04 (-0.04 - 0.12) | -0.03 (-0.13- 0.07) | 0.02 (-0.08 - 0.12) | 0.04 ( -0.05 - 0.14) |

**Table S2. Associations between travel time to hospital and maternal postpartum health service use, presented as absolute risk**

**All women**: analyses included all women and adjusted for observed confounders. The following observed confounders were adjusted : maternal age, parity, maternal education level, immigration status, birth year, month of birth, weekday of birth, actual hospital volume, GP contact within 1 year before birth, out of hours GP contact within 1 year before birth, contacts with the specialist mental health care within 1 year before birth, GP contact for sick leave within 1 year before birth, GP contacts with psychiatric diagnosis code within 1 year before birth, and Diagnostic-Related Groups (DRG) codes 1 year before birth.

**Moving women**: analyses included women moving between hospital catchment area border between births. The analyses were adjusted for maternal age, parity, birth year and expected hospital volume.

|  |  |  |  |  |  |  |
| --- | --- | --- | --- | --- | --- | --- |
|  |  | **30 min.** | **60 min.** | **120 min.** | **180 min.** | **240 min.** |
| **Days of GP contact** | All women | *Reference* | 0.26 (0.18 - 0.34) | 0.37 (0.24 - 0.49) | 0.35 (0.22 - 0.48) | 0.34 (0.20 - 0.47) |
| Moving women | *Reference* | -0.06 (-0.18 - 0.06) | -0.02 ( -0.1 - 0.13) | -0.05 (-0.20 - 0.11) | 0.09 (-0.26 - 0.08) |
| **Days of out of hours GP contact** | All women | *Reference* | -0.01(-0.04- 0.02) | -0.02(-0.06 - 0.03) | 0.02(-0.06 - 0.03) | -0.02(-0.06 - 0.03) |
| Moving women | *Reference* | 0.00 (-0.04 - 0.04) | -0.02 (-0.07 - 0.03) | -0.04 (-0.09 - 0.01) | -0.06 (-0.12 - 0.01) |
| **Days of emergency contacts with hospital** | All women | *Reference* | 0.03(-0.02- 0.09) | 0.06 (-0.02 - 0.14) | 0.07 (-0.01 - 0.15) | 0.08 (-0.00 - 0.16) |
| Moving women | *Reference* | -0.05(-0.16 - 0.07) | -0.05(-0.22 - 0.11) | -0.06(-0.23 - 0.12) | -0.08(-0.24 - 0.09) |
| **Duration of hospital stay after delivery excluding the initial delivery stay** | All women | *Reference* | 0.05 (0.03 - 0.08) | 0.08 (0.03 - 0.13) | 0.09 (0.01 - 0.17) | 0.10 (-0.01 - 0.21) |
| Moving women | *Reference* | 0.05 (-0.11 - 0.21) | -0.12 ( -0.31 - 0.07) | -0.02 (-0.16 - 0.12) | 0.18 (-0.02 - 0.34) |
| **Days in hospital for delivery admission** | All women | *Reference* | 0.44 (0.28 - 0.60) | 0.66 (0.33 - 0.99) | 0.68 (0.15 - 1.20) | 0.70 (-0.04 - 0.43) |
| Moving women | *Reference* | -0.06 (-0.11 - -0.01) | 0.03 ( -0.05 - 0.11) | 0.05 (-0.03 - 0.13) | 0.05 (-0.03 - 0.13) |
| **Days of contacts with specialist mental health service** | All women | *Reference* | 0.01 (-0.01 - 0.03) | 0.02 ( -0.04 - 0.08) | 0.03 (-0.08 - 0.13) | 0.04 (-0.12 - 0.19) |
| Moving women | *Reference* | -0.05 (-0.13 - -0.03) | 0.00 ( -0.07 - 0.08) | 0.02 (-0.05 - 0.10) | 0.03 (-0.08 - 0.14) |
| **Days of GP contacts for conversation therapy** | All women | *Reference* | 0.09 (0.04 - 0.14) | 0.14 (0.07 - 0.21) | 0.15 (0.07 - 0.22) | 0.15 (0.08 - 0.23) |
| Moving women | *Reference* | 0.00 (-0.03 - 0.04) | 0.05 (0.01 - 0.10) | 0.01 (-0.03 - 0.06) | -0.05 (-0.11 - 0.00) |
| **Days of GP contacts with psychiatric diagnosis code** | All women | *Reference* | 0.01 (-0.01 - 0.03) | 0.02 ( -0.01 - 0.05) | 0.01 (-0.02 - 0.04) | 0.01 (-0.02 - 0.04) |
| Moving women | *Reference* | -0.02 (-0.08 - 0.04) | 0.00 ( -0.07 - 0.07) | -0.01 (-0.08 - 0.05) | -0.05 (-0.13 - 0.03) |
